# Supplementary material for: Depression following a traumatic brain injury: uncovering cytokine dysregulation as a pathogenic mechanism
Source: PubMed Central journal article supplement — Neural Regen Res. 2018 Oct;13(10):1693–704. doi: 10.4103/1673-5374.238604 (PMC6128046; doi:10.4103/1673-5374.238604), 2018-10
Supplement: NRR-13-1693_Suppl1.pdf [file NRR-13-1693_Suppl1.pdf]

## PEER-REVIEW REPORT 1

**Name of journal:** Neural Regeneration Research

**Manuscript NO:** NRR-D-18-00352

**Title:** Depression following a traumatic brain injury: uncovering cytokine dysregulation as a pathogenic mechanism

**Reviewer's Name:** Stephanie K Seidlits

**Reviewer's country:** USA

**Date sent for review:** 2018-06-21

**Date reviewed:** 2018-06-29

**Review time:** 8 Days

| Manuscript Rating Question(s):                                                          | Scale | Rating |
|-----------------------------------------------------------------------------------------|-------|--------|
| The subject addressed in this article is worthy of investigation. (3 as the best score) | [1-3] | 3      |
| The information presented was new. (5 as the best score)                                | [1-5] | 4      |

### COMMENTS TO AUTHORS

This is a focused, yet thorough, review of the current state of knowledge concerning possible links between TBI-induced inflammation and development of depressive disorders. A few very minor comments are noted:

1. Abstract, second sentence: Consider revising the clause "including, ability to return to work, and the depression can even worsen cognitive function and contribute to dementia". It is awkward with the current wording and punctuation.
2. Introduction, pg. 4, line 48: Remove comma after "treating depression" and before "can reduce".
3. pg. 6, line 60: At the end of the sentence, "for example" can be deleted.
4. pg. 11, line 6: Please add citations for the reviews and meta-analyses referred to here.
5. pg. 11, line 46: The commas offsetting the text "by reactive microglia/macrophages" should be deleted.
